# Supplementary material for: Giving samples or “getting checked”: measuring conflation of observational biospecimen research and clinical care in Latino communities
Source: PubMed Central journal article supplement (PMC4504441; doi:10.1186/s12910-015-0041-9), 2015-07-17
Supplement: 12910_2015_41_MOESM1_ESM.pdf [file 12910_2015_41_MOESM1_ESM.pdf]

Supplementary Table 1. Item-level data for domain one of piloted survey instrument.

| Domain                                                                                                                               | Item                                                                                                  | Frequency |      |      |      |         | Mean | SD   |      |
|--------------------------------------------------------------------------------------------------------------------------------------|-------------------------------------------------------------------------------------------------------|-----------|------|------|------|---------|------|------|------|
|                                                                                                                                      |                                                                                                       | 1         | 2    | 3    | 4    | Missing |      |      |      |
| Lay understanding                                                                                                                    | 1. A person must be sick to give a sample for scientific research. <sup>a</sup>                       | n         | 21   | 89   | 32   | 8       | 0    | 2.18 | 0.73 |
|                                                                                                                                      |                                                                                                       | %         | 14.0 | 59.3 | 21.3 | 5.3     | 0    |      |      |
|                                                                                                                                      | 2. A person is not required to take medicine when giving a biological sample for scientific research. | n         | 19   | 64   | 57   | 10      | 0    | 2.39 | 0.79 |
|                                                                                                                                      |                                                                                                       | %         | 12.7 | 42.7 | 38.0 | 6.7     | 0    |      |      |
|                                                                                                                                      | 3. A person must go to the hospital to give a biological sample for scientific research. <sup>a</sup> | n         | 9    | 48   | 73   | 20      | 0    | 2.69 | 0.78 |
|                                                                                                                                      |                                                                                                       | %         | 6.0  | 32.0 | 48.7 | 13.3    | 0    |      |      |
| 4. A healthy person can give a biological sample for scientific research.                                                            | n                                                                                                     | 50        | 92   | 7    | 1    | 0       | 1.73 | 0.58 |      |
|                                                                                                                                      | %                                                                                                     | 33.3      | 61.3 | 4.7  | 0.7  | 0       |      |      |      |
| 5. A person must be invited by a doctor to give a biological sample for scientific research. <sup>a</sup>                            | n                                                                                                     | 13        | 63   | 58   | 45   | 1       | 2.50 | 0.79 |      |
|                                                                                                                                      | %                                                                                                     | 8.7       | 42.0 | 38.7 | 10.0 | 0.7     |      |      |      |
| 6. Scientific research using biological samples is mainly done to test if new medical treatments are safe for humans. <sup>a,b</sup> | n                                                                                                     | 4         | 16   | 95   | 33   | 2       | 3.06 | 0.66 |      |
|                                                                                                                                      | %                                                                                                     | 2.7       | 10.7 | 63.3 | 22.0 | 1.3     |      |      |      |

Note: SD=standard deviation; Response categories: 1= strongly agree; 2=agree; 3=disagree; 4=strongly disagree.

<sup>a</sup>Items were reverse coded, so that a higher score indicates presence of a misconception; <sup>b</sup>Skewed item.

Supplementary Table 2. Item-level data for domain two of piloted survey instrument.

| Domain  | Item                                                                                                                                             | Frequency |      |      |      |         | Mean | SD   |      |
|---------|--------------------------------------------------------------------------------------------------------------------------------------------------|-----------|------|------|------|---------|------|------|------|
|         |                                                                                                                                                  | 1         | 2    | 3    | 4    | Missing |      |      |      |
| Purpose | 1. The purpose of scientific research using biological samples is to give the best medical information to those who give samples. <sup>a</sup>   | n         | 0    | 20   | 99   | 31      | 0    | 3.07 | 0.58 |
|         |                                                                                                                                                  | %         | 0    | 13.3 | 66.0 | 20.7    | 0    |      |      |
|         | 2. Scientific research using biological samples is done to help the people who give samples, not to help future generations. <sup>a</sup>        | n         | 20   | 58   | 57   | 15      | 0    | 2.45 | 0.85 |
|         |                                                                                                                                                  | %         | 13.3 | 38.7 | 38.0 | 10.0    | 0    |      |      |
|         | 3. A scientific researcher's number one job is to make sure that the research helps each person who gives a biological sample. <sup>a</sup>      | n         | 6    | 35   | 80   | 29      | 0    | 2.88 | 0.76 |
|         | %                                                                                                                                                | 4.0       | 23.3 | 53.3 | 19.3 | 0       |      |      |      |
|         | 4. Researchers mostly do scientific research using biological samples to tell people who give samples if they are sick. <sup>a</sup>             | n         | 7    | 47   | 70   | 26      | 0    | 2.77 | 0.79 |
|         | %                                                                                                                                                | 4.7       | 31.3 | 46.7 | 17.3 | 0       |      |      |      |
|         | 5. Scientific research using biological samples is done to learn about what causes disease, not about each person who gives a biological sample. | n         | 38   | 93   | 17   | 2       | 0    | 1.89 | 0.64 |
|         | %                                                                                                                                                | 25.3      | 62.0 | 11.3 | 1.3  | 0       |      |      |      |

|                                                                                                                                                               |   |      |      |     |     |     |      |      |
|---------------------------------------------------------------------------------------------------------------------------------------------------------------|---|------|------|-----|-----|-----|------|------|
| 6. The goal of scientific research with biological samples is help people in the future, whether or not it helps each person who gives a sample. <sup>b</sup> | n | 50   | 89   | 9   | 2   | 0   | 1.75 | 0.62 |
|                                                                                                                                                               | % | 33.3 | 59.3 | 6.0 | 1.3 | 0   |      |      |
| 7. A scientific researcher's number one goal is to learn more about how to fight disease.                                                                     | n | 59   | 86   | 4   | 0   | 1   | 1.63 | 0.54 |
|                                                                                                                                                               | % | 39.3 | 57.3 | 2.7 | 0   | 0.7 |      |      |

Note: SD=standard deviation; Response categories: 1= strongly agree; 2=agree; 3=disagree; 4=strongly disagree.

<sup>a</sup>Items were reverse coded, so that a higher score indicates presence of a misconception; <sup>b</sup>Skewed item.

Supplementary Table 3. Item-level data for domain three of piloted survey instrument.

| Domain                                                                                                                                          | Item                                                                                                                | Frequency |      |      |      |         | Mean | SD   |      |
|-------------------------------------------------------------------------------------------------------------------------------------------------|---------------------------------------------------------------------------------------------------------------------|-----------|------|------|------|---------|------|------|------|
|                                                                                                                                                 |                                                                                                                     | 1         | 2    | 3    | 4    | Missing |      |      |      |
| Benefits                                                                                                                                        | 1. Researchers will always tell people if their biological sample shows risk for disease. <sup>a</sup>              | n         | 4    | 25   | 87   | 34      | 0    | 3.01 | 0.71 |
|                                                                                                                                                 |                                                                                                                     | %         | 2.7  | 16.7 | 58.0 | 22.7    | 0    |      |      |
|                                                                                                                                                 | 2. Giving a biological sample for scientific research may not give you any important information about your health. | n         | 19   | 69   | 54   | 8       | 0    | 2.34 | 0.77 |
|                                                                                                                                                 |                                                                                                                     | %         | 12.7 | 46.0 | 36.0 | 5.3     | 0    |      |      |
|                                                                                                                                                 | 3. One reason to give a biological sample for scientific research is to get a medical checkup. <sup>a</sup>         | n         | 11   | 54   | 71   | 14      | 0    | 2.59 | 0.76 |
|                                                                                                                                                 |                                                                                                                     | %         | 7.3  | 36.0 | 47.3 | 9.3     | 0    |      |      |
| 4. By giving a biological sample for scientific research, a person will always get important information about their disease risk. <sup>a</sup> | n                                                                                                                   | 3         | 28   | 93   | 26   | 0       | 2.94 | 0.66 |      |
|                                                                                                                                                 | %                                                                                                                   | 2.0       | 18.7 | 62.0 | 17.3 | 0       |      |      |      |
| 5. When you give a biological sample for scientific research you always learn if you might get the disease they are studying. <sup>a</sup>      | n                                                                                                                   | 2         | 36   | 92   | 20   | 0       | 2.87 | 0.64 |      |
|                                                                                                                                                 | %                                                                                                                   | 1.3       | 24.0 | 61.3 | 13.3 | 0       |      |      |      |
| 6. One reason to give a biological sample for scientific research is to find out if you have a disease. <sup>a</sup>                            | n                                                                                                                   | 5         | 26   | 96   | 23   | 0       | 2.91 | 0.67 |      |
|                                                                                                                                                 | %                                                                                                                   | 3.3       | 17.3 | 64.0 | 15.3 | 0       |      |      |      |

|                                                                                                                                                    |   |     |      |      |      |     |      |      |
|----------------------------------------------------------------------------------------------------------------------------------------------------|---|-----|------|------|------|-----|------|------|
| 7. Information you get by giving a biological sample for scientific research is the best information about your health you could get. <sup>a</sup> | n | 5   | 36   | 77   | 31   | 1   | 2.90 | 0.76 |
|                                                                                                                                                    | % | 3.3 | 24.0 | 51.3 | 20.7 | 0.7 |      |      |

Note: SD=standard deviation; Response categories: 1= strongly agree; 2=agree; 3=disagree; 4=strongly disagree.

<sup>a</sup>Items were reverse coded, so that a higher score indicates presence of a misconception.
